# Supplementary material
Source: HighWire-hosted journal article supplement (https://bmjopen.bmj.com/content/15/3/e088551)
Supplement: inline-supplementary-material-1 [file inline-supplementary-material-1.pdf]

## Supplementary material 1

### Characteristics of the bereaved survivors

#### 1) Gender:

#### 2) Age:

#### 3) Education Level:

- Illiterate
- Primary school
- Secondary school
- High school
- University
- Test statistics

#### 4) Occupation: .....

#### 5) Income Level:

#### 6) Family Status:

- Single
- Married

#### 7. Closeness with the deceased:.....

#### 8. Chronic disease (A multiple choice option is available):

- Congestive heart failure
- Cancer
- Chronic obstructive pulmonary disease
- End-stage renal disease

## Supplementary material 2

### 1. Introduction

- Thank you for agreeing to take part.
- Give background & purpose to study: we want to identify .....This will help identify areas to improve ..... in the future.
- Acknowledge the loss of family members.
- Acknowledge that the topic is upsetting / sensitive. If they want to have a break at any time (and stop the recording) that is absolutely fine.
- Check what support is in place for after the interview/after that day (i.e. who), signpost to counselling services (give contact numbers).
- Explain the consent procedure, right to withdraw, confidentiality and audio recording of the discussion. Break at any time if required. Interview discussion to last 30–60 min. Check that they have understood the information sheet, confidentiality information and check understanding.
- Explain how the discussion that is going to take place will be used in the research.
- Findings will be published in academic journals
- Complete consent forms

I would really like to start by hearing about you and your experience after the Earthquake. Is that okay?

- 1) Please describe your relationship with your loved who died in the Earthquake, starting as far back as you can remember; (2) How have your interactions with your surviving family members changed as a result of your grief and loss?; (3) What was it like to experience the death of your .....(Child/mom/dad/sibling)?; (4) How have you dealt with your grief related to the death of your loved one?; and (5) How have you managed to stay resilient in spite of such a tremendous loss?

What else could have been done to help you through your difficult time? (• Probe: institutional support: for views on counselling and support services offered, • Probe: professional support (staff) i.e. rapport, respect, empathy, listening, • Probe: social support (partner, family, friends) i.e. respect, empathy, listening, acknowledgement If there was one recommendation you could make what would it be? • Probe: views on how services could be improved to support bereaved survivors)

### 3- Closing (Any other comments, suggestions or questions)

I would like to ask you for your final thoughts reflections as we come to the end of our discussion. You have been through a difficult experience, and I am grateful that you have shared it. Your views are very valuable to us, and we hope that you have not found it too distressing to share your experience. Your views will help develop bereavement support; we will be able to highlight areas for change to make improvements for bereaved individuals.
